# Supplementary material for: Tumor heterogeneity and tumor-microglia interactions in primary and recurrent IDH1-mutant gliomas
Source: PubMed Central journal article supplement — Cell Rep Med. 2023 Oct 25;4(11):101249. doi: 10.1016/j.xcrm.2023.101249 (PMC10694621; doi:10.1016/j.xcrm.2023.101249), 2023-10-25
Supplement: mmc1.pdf [file mmc1.pdf]

**Cell Reports Medicine, Volume 4**

**Supplemental information**

**Tumor heterogeneity  
and tumor-microglia interactions  
in primary and recurrent IDH1-mutant gliomas**

**Enrique Blanco-Carmona, Ashwin Narayanan, Inmaculada Hernandez, Juan C. Nieto, Marc Elosua-Bayes, Xueyuan Sun, Claudia Schmidt, Necmettin Pamir, Koray Özduman, Christel Herold-Mende, Francesca Pagani, Manuela Cominelli, Julian Taranda, Wolfgang Wick, Andreas von Deimling, Pietro Luigi Poliani, Michael Rehli, Matthias Schlesner, Holger Heyn, and Şevin Turcan**

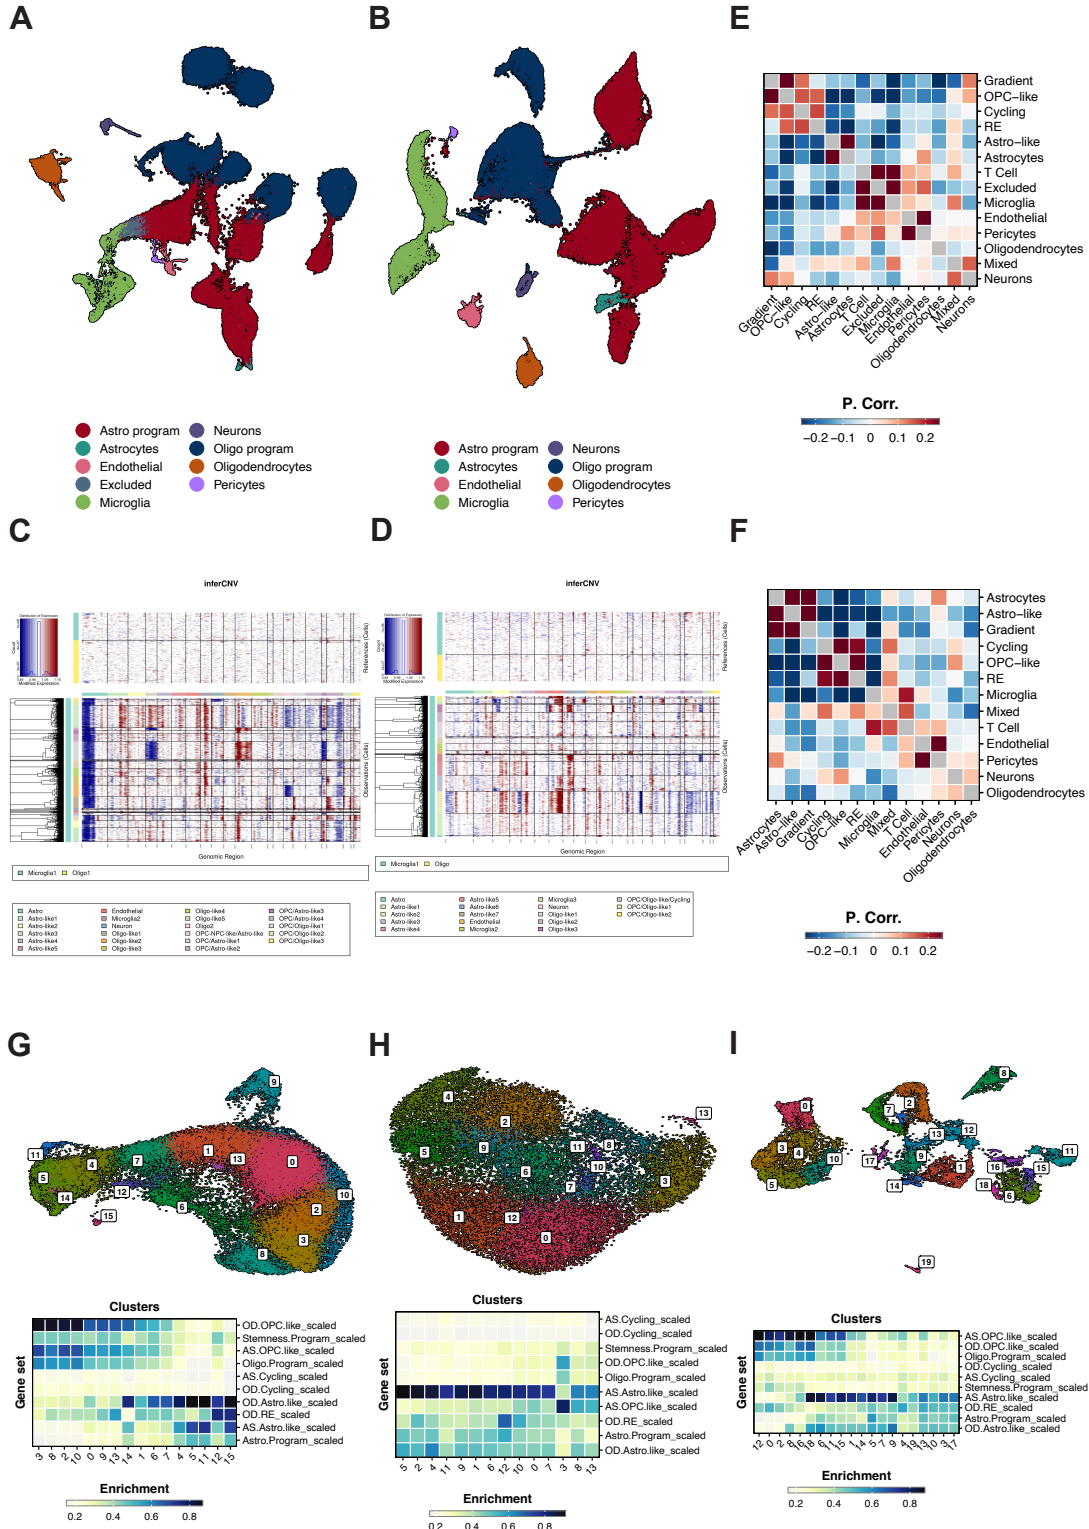



**Figure S1. UMAP of merged snRNA-seq data, inferred CNVs, and characterization of the gradient cluster. Related to Figure 1 and STAR methods.** (A and B) UMAP and initial cluster assignment for merged snRNA-seq data from oligodendroglioma (A) and astrocytoma (B). Colors represent assigned cell types. UMAP1, *x*-axis; UMAP2, *y*-axis. (C and D) Heatmap of CNV profiles inferred from snRNA-seq from oligodendrogliomas (C) and astrocytomas (D). Each row corresponds to a nucleus, ordered by initial cluster labeling from merged data. Red indicates gain and blue indicates loss. (E and F) Correlation heatmap depicting expression similarities (Pearson's correlation) between the highly variable genes in tumor and TME populations of oligodendrogliomas (E) and astrocytomas (F). (G, H, and I) Gradient subset of the tumor subpopulation for primary oligodendrogliomas (G), primary astrocytomas (H) and paired astrocytomas (I). Cells are re-normalized, and dimensional reduction is computed, generating a new UMAP embedding and clustering (top). For each cluster, enrichment scores for the NMF metaprograms and the programs described in *Venteicher, et al.* are computed, and displayed as an enrichment heatmap (bottom). UMAP1, *x*-axis; UMAP2, *y*-axis.

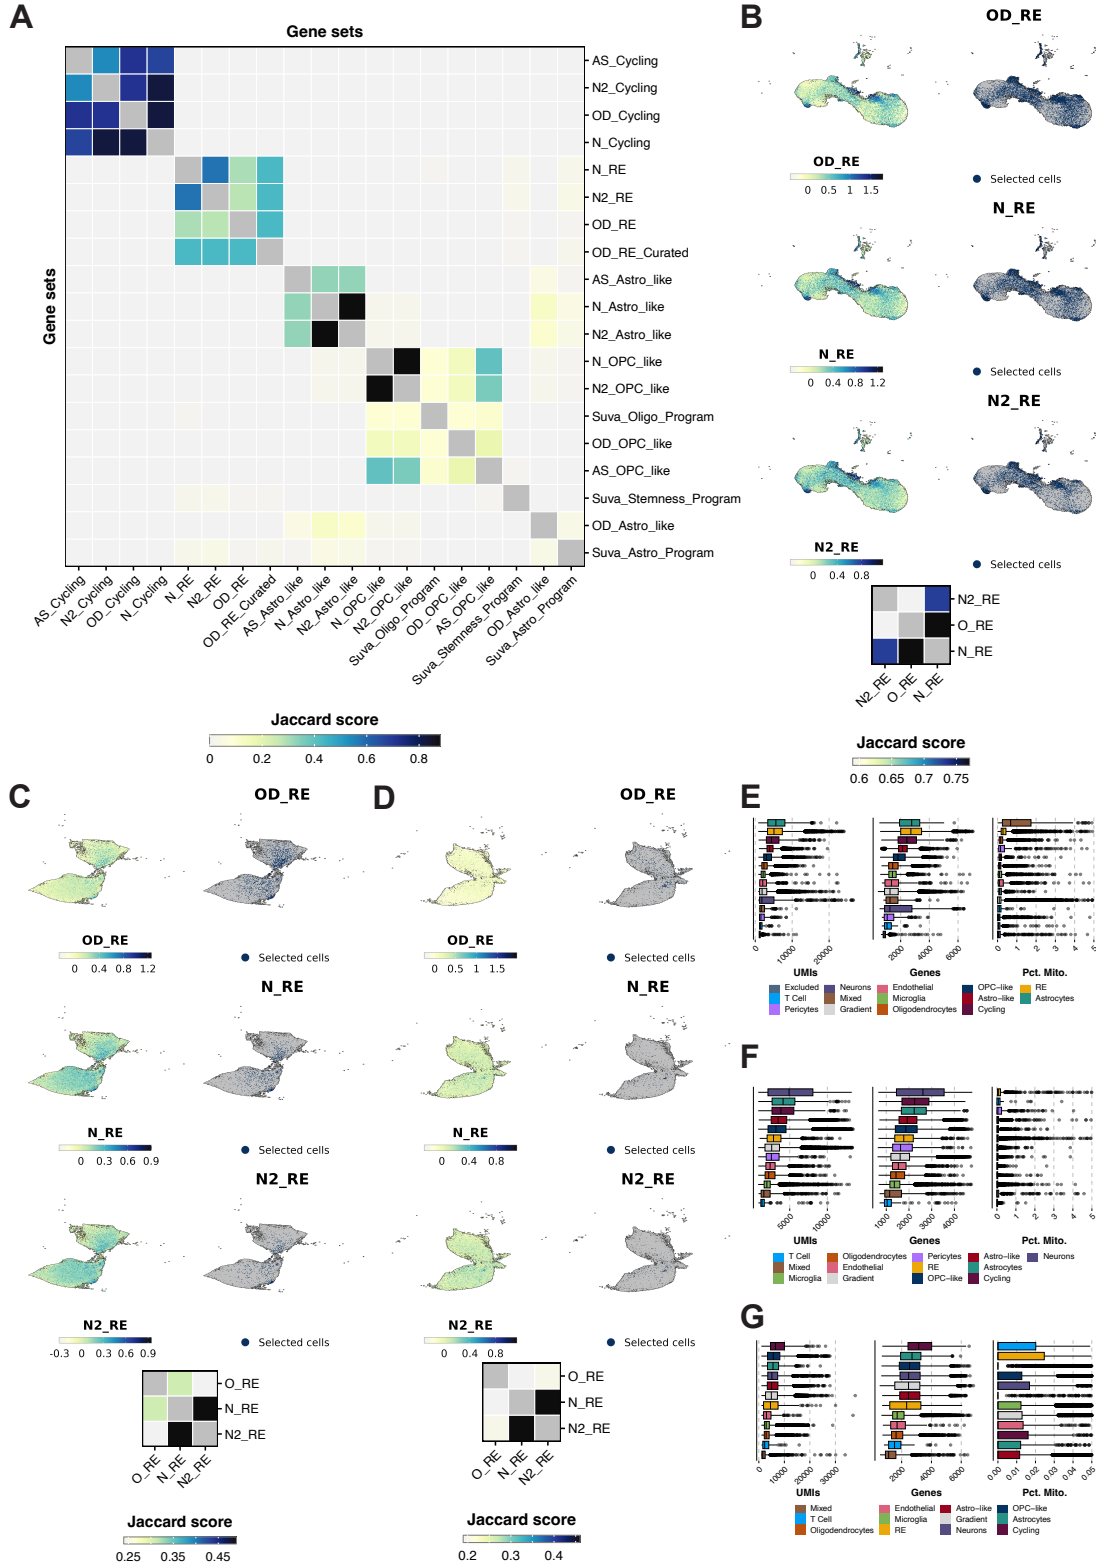

**Figure S2. Characterization of the NMF programs, and quality control for all clusters in snRNA-seq datasets. Related to Figures 1 and 4, and STAR methods.** (A) Correlation matrix depicting the Jaccard similarities between the NMF metaprograms and the Astrocyte-like, Oligo-like and Stemness programs in *Venteicher, et al.* Three iterations of NMF have been computed, represented by the prefixes in the metaprograms name: OD\_ and AS\_ metaprograms belong to the first iteration, containing ribosomal genes. N\_ metaprograms correspond to the metaprograms retrieved prior removal of ribosomal genes. N2\_ metaprograms refer to the metaprograms retrieved prior removal of ribosomal genes and exclusion of sample *IDH ACB AD 540*, which has a significantly higher proportion of RE. OD\_RE\_Curated metaprogram contains the genes present in all three RE metaprogram iterations. (B-D) Jaccard similarities depict a high consensus between all homologue iterations of NMF metaprograms. Permutation testing selection method based on the enrichment scores for the three different RE metaprograms retrieved including ribosomal genes (*OD RE*), excluding them (*N RE*) and excluding the sample with the highest proportion of RE cells, *IDH ACB AD 540* (*N2\_RE*) is used in the tumor cells of oligodendrogliomas (B) and astrocytomas (C) and paired astrocytomas (D). Jaccard similarities between the selected cells for each of the NMF metaprograms is shown (bottom). Enrichment scores are shown on the left and the selected cells on the right. UMAP1, x-axis; UMAP2, y-axis. (E-G) Boxplots showing from left to right, distribution of UMIs per cell, genes per cell and percentage of mitochondrial RE per cell are shown for primary oligodendroglioma (A), primary astrocytoma (B) and paired astrocytoma (C) tumors.

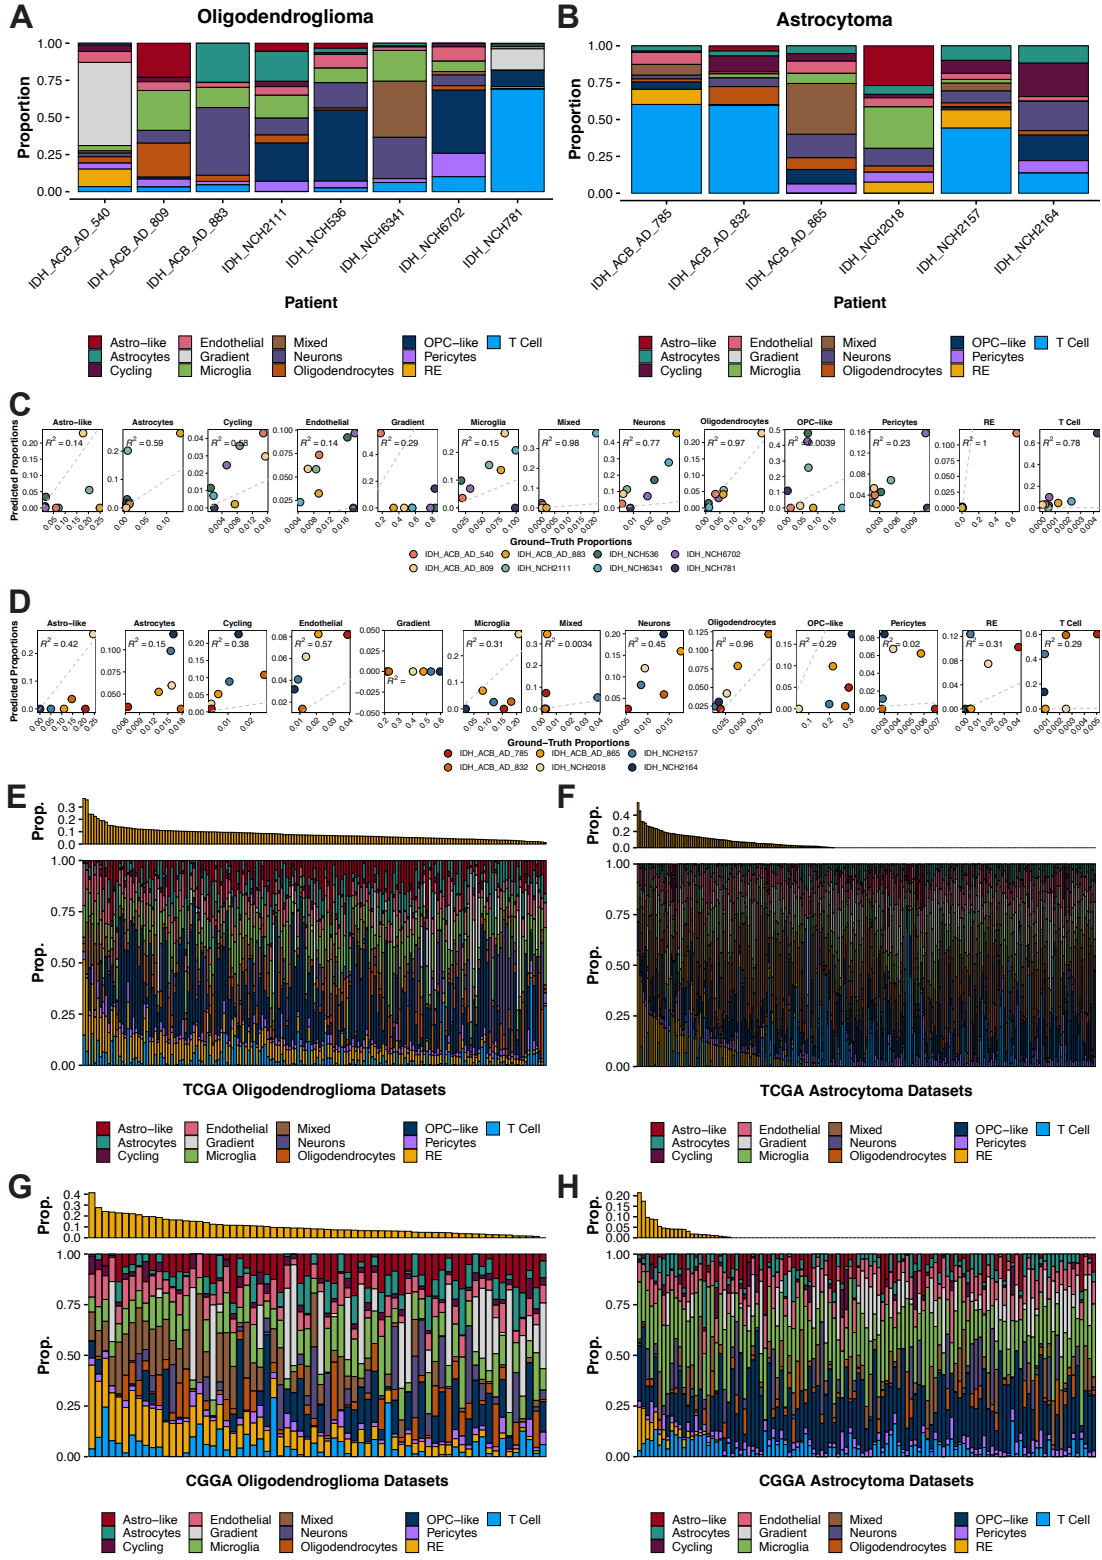

**Figure S3. Deconvolution of publicly available bulk glioma RNA-seq datasets (TCGA and CGGA). Related to Figure 1 and STAR methods.** (A) Deconvolution of primary samples (pseudobulk) for oligodendroglioma (OD). (B) Deconvolution of primary samples (pseudobulk) for astrocytoma (AS). (C) Correlation analysis between predicted proportions (SPOTlight) ground-truth proportions (primary samples) in OD. (D) Correlation analysis between predicted proportions (SPOTlight) ground-truth proportions (primary samples) in AS. (E) SPOTlight results of TCGA (the Cancer Genome Atlas) OD IDH mutant glioma cohort (on top, proportion of RE, ordered. on the bottom, all proportions ordered also by descending RE). (F) SPOTlight results of TCGA AS IDH mutant glioma cohort (on top, proportion of RE, ordered. on the bottom, all proportions ordered also by descending RE) (G) SPOTlight results of CGGA OD (Chinese Glioma Genome Atlas) IDH mutant glioma cohort (on top, proportion of RE, ordered. on the bottom, all proportions ordered also by descending RE). (H) SPOTlight results of CGGA AS IDH mutant glioma cohort (on top, proportion of RE, ordered. on the bottom, all proportions ordered also by descending RE).

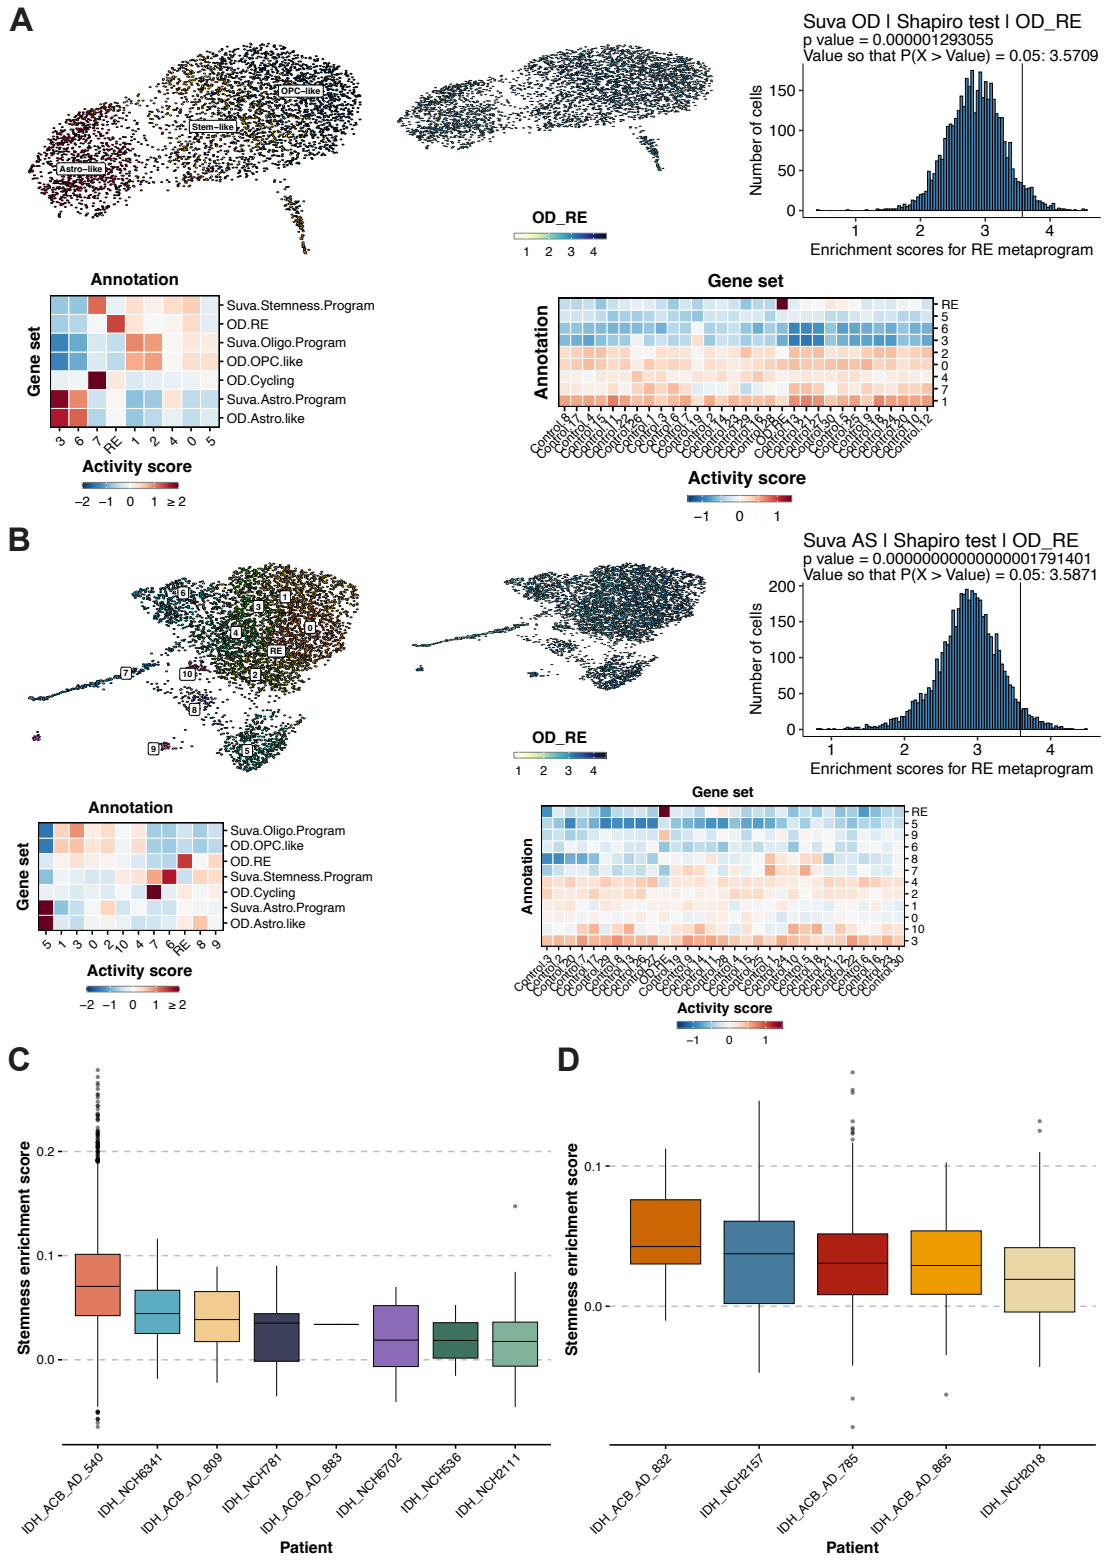

**Figure S4. The RE metaprogram in publicly available scRNA-seq datasets from IDH mutant gliomas, and the stemness score per patient in snRNA-seq dataset from oligodendrogliomas and astrocytomas. Related to Figure 1 and STAR methods (A and B)** Datasets from publicly available oligodendrogliomas<sup>3</sup> (A) and astrocytomas<sup>4</sup> (B) are used to determine the presence of the RE metaprogram. UMAP representation of the tumor cells is shown together with the enrichment scores for the RE metaprogram (top, left and middle). The distribution of enrichment scores is tested for normality using Shapiro test (top-right) and the value so that the probability of finding an enrichment score higher is 5% is used to select the RE population. The activity of the different cell clusters and the RE population towards the NMF metaprograms and the publicly available programs<sup>4</sup> is computed by using *decoupleR*. Activity scores are scaled and centered and displayed grouped by cell population (bottom-left). To query the robustness of RE metaprogram towards the RE population, 50 different gene sets of equal size are generated by randomly selecting genes in the same bin of expression as the genes in the RE metaprogram. Activity scores are computed, scaled, and centered, and displayed grouped by cell population. UMAP1, x-axis; UMAP2, y-axis. (C and D) Box plots of the enrichment score for the stemness program in *Venteicher, et al* per patient in oligodendroglioma (C) and astrocytoma (D).

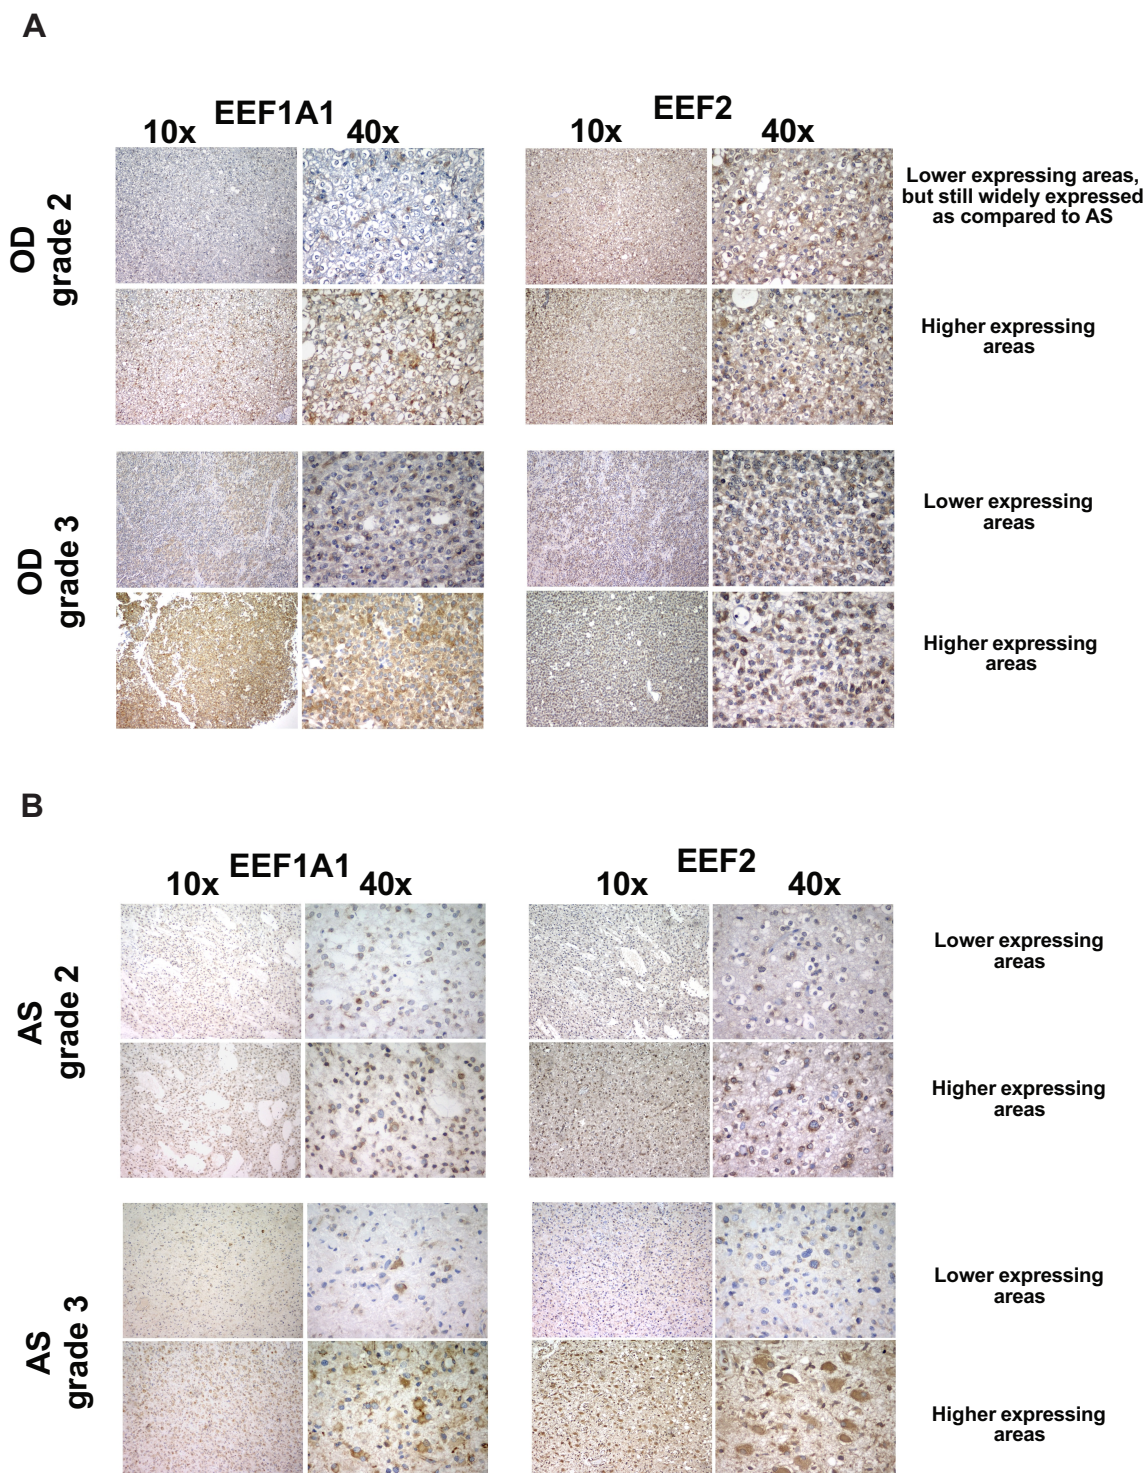

**Figure S5. Representative IHC staining for EEF1A1 and eEF2 in IDH mutant gliomas. Relate to Figure 1. (A, B) Representative IHC staining for EEF1A1 and eEF2 population marker genes in grade 2 (top) and grade 3 (bottom) oligodendrogliomas (A) and astrocytomas (B). Images are shown as 10x and 40x to show the spatial distribution of EEF1A1 and EEF2 in both tumor types. *OD*, oligodendroglioma; *AS*, astrocytoma.**



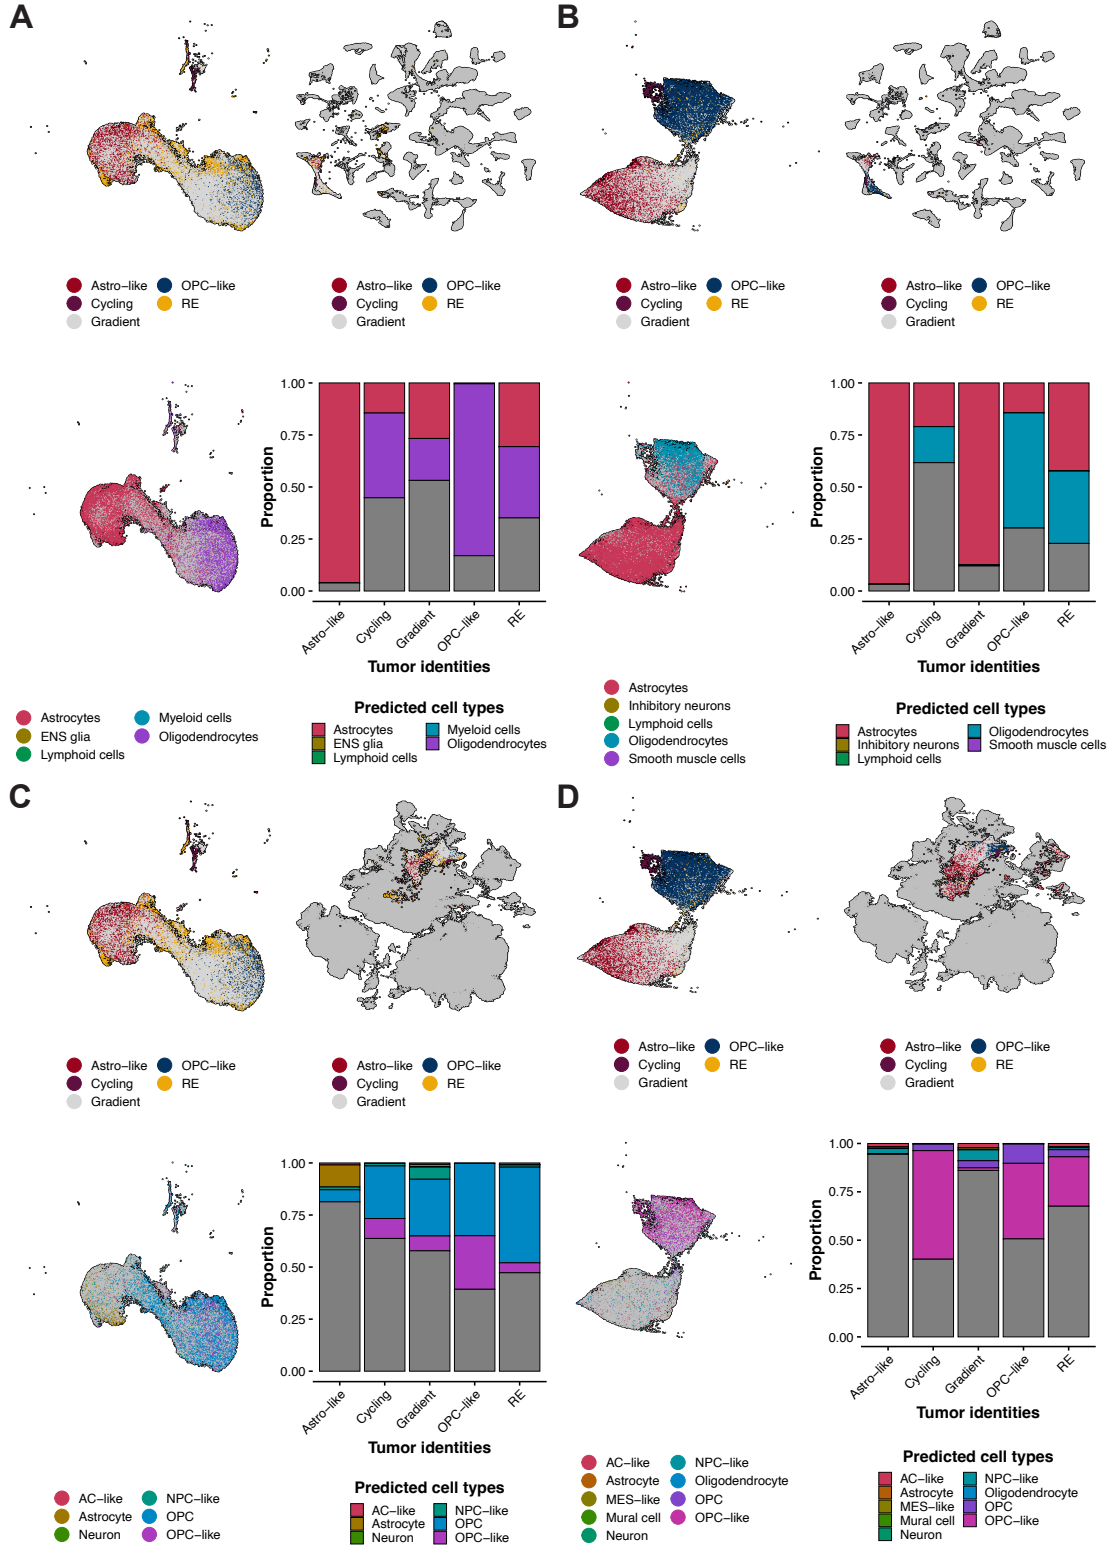

**Figure S6. Reference mapping using Azimuth. Related to Figure 1 and STAR methods.** (A, B) Tumor subsets for primary oligodendrogliomas (A) and primary astrocytomas (B) are mapped onto the *fetus reference* from Azimuth. (C, D) Tumor subsets for primary oligodendrogliomas (C) and primary astrocytomas (D) are mapped onto the *GBmap* reference. For each variation, original UMAP embedding is shown on the top-left, cells mapped onto the reference UMAP on the top-right, cells re-labelled based on the reference mapping on the bottom left and a bar plot of the proportions of the new annotation per each original tumor entity on the bottom-right. UMAP1, x-axis; UMAP2, y-axis.

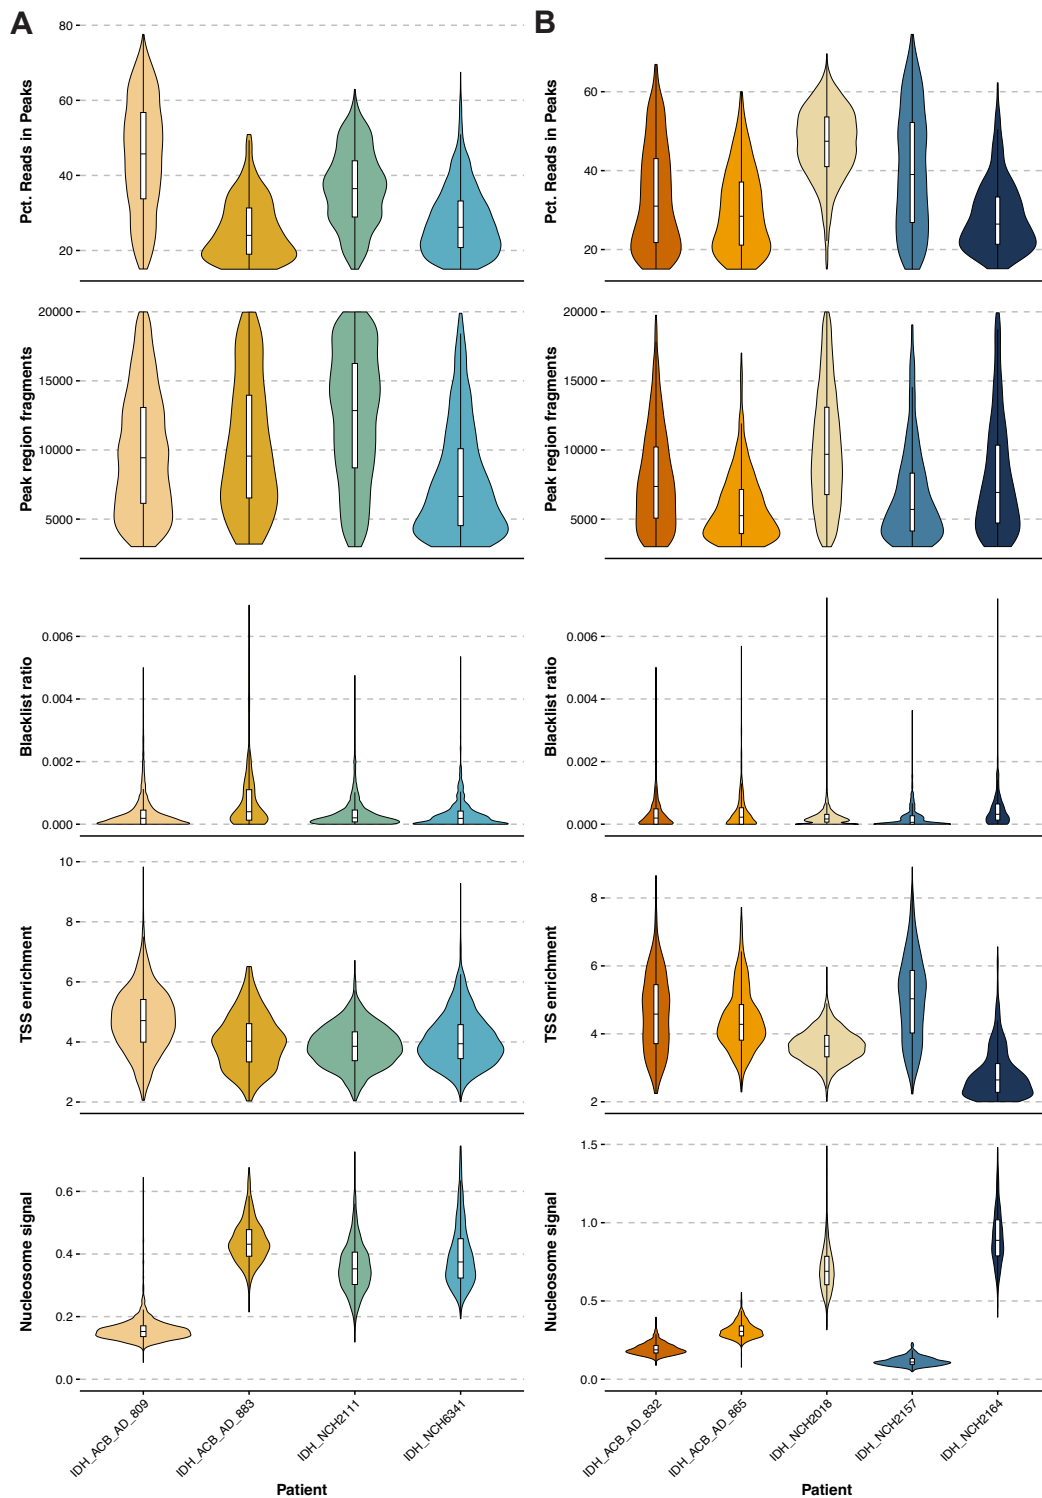

**Figure S7. Quality control metrics of snATAC-seq data. Related to Figure 2. (A and B)** Quality control metrics of snATAC-seq data generated from oligodendrogliomas (A) and astrocytomas (B). From top to bottom: Percentage of reads in peaks; peak region fragments; blacklist ratio; transcription start site (TSS) enrichment score and nucleosome signal.

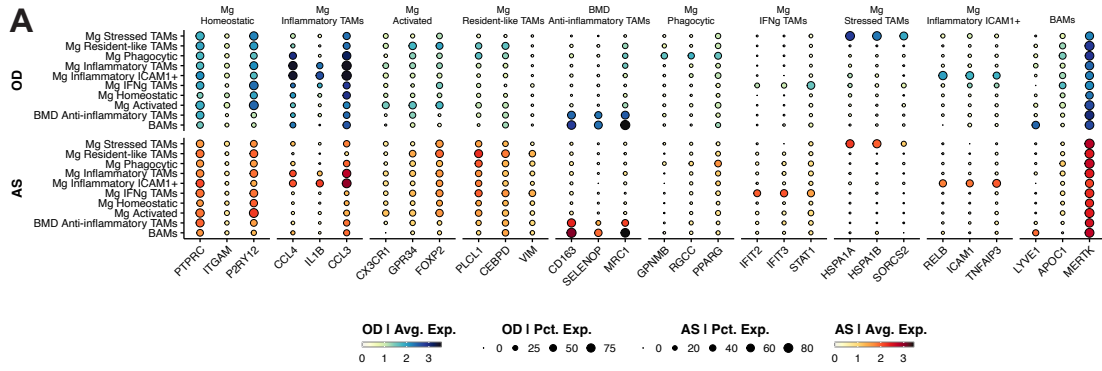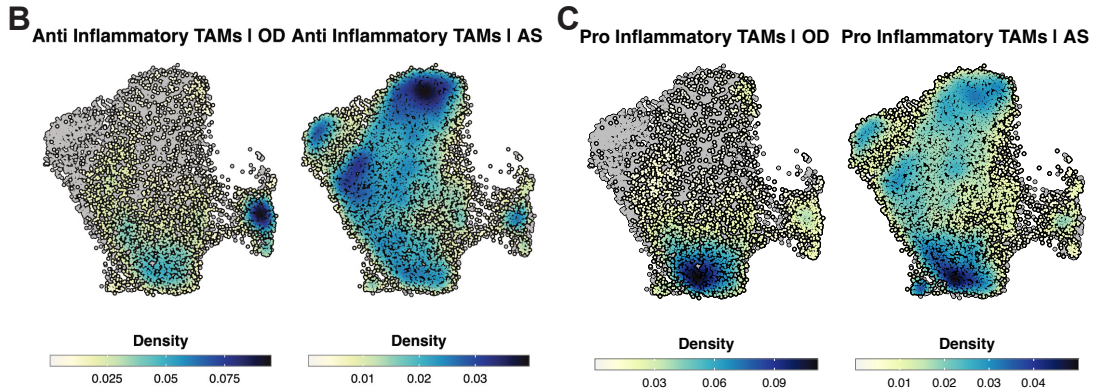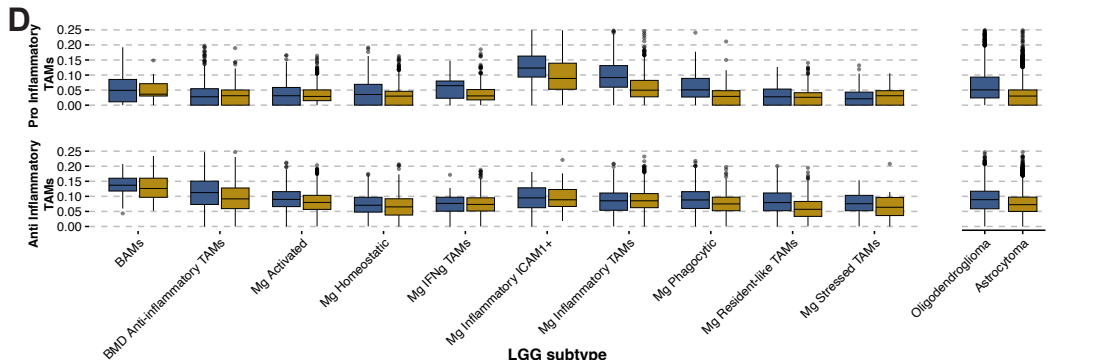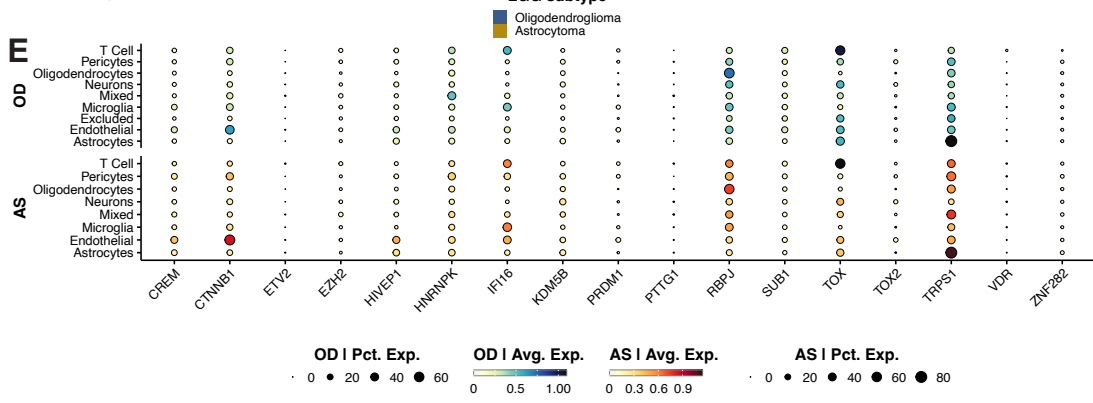

**Figure S8. Markers for TAM subpopulations and TME of IDH mutant gliomas derived from snRNA-seq data. Related to Figure 1 and 3. (A)** Dot plot showing three key marker genes for the TAM subpopulations in oligodendrogliomas (**top**) and astrocytomas (**bottom**). OD, oligodendroglioma; AS, astrocytoma. **(B)** Density gradient of pro-inflammatory and anti-inflammatory signatures in TAMs of astrocytomas (**B**) and oligodendrogliomas (**C**). OD, oligodendroglioma; AS, astrocytoma. **(D)** Boxplots showing pro-inflammatory (top) and anti-inflammatory (bottom) scores per TAM subpopulation in oligodendrogliomas and astrocytomas. **(E)** Dot plot showing marker genes for the T cell population in oligodendrogliomas (top) and astrocytomas (bottom). OD, oligodendroglioma; AS, astrocytoma.

A

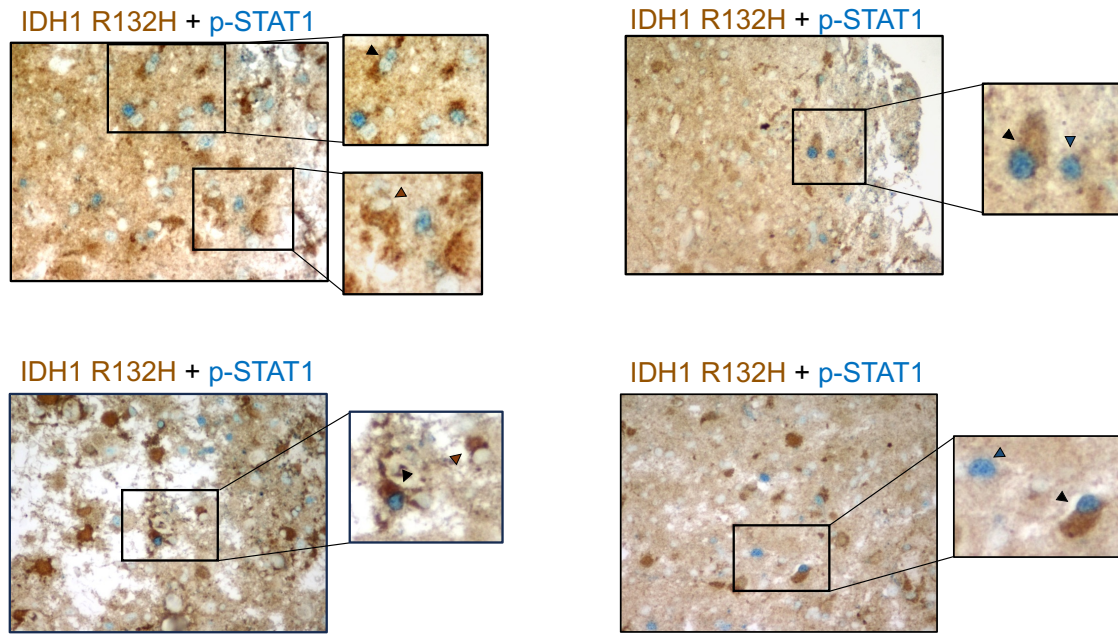

B

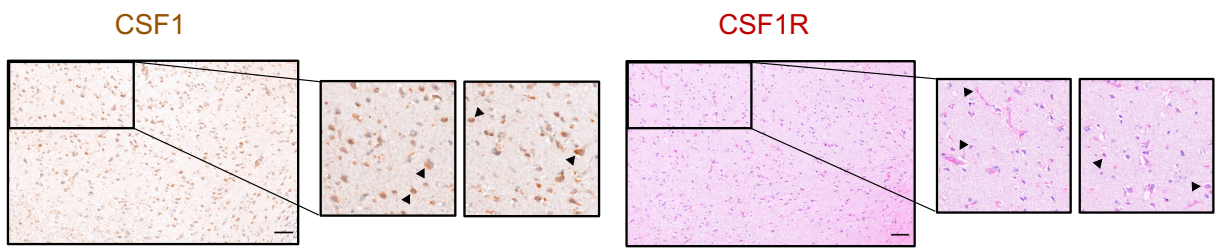

C

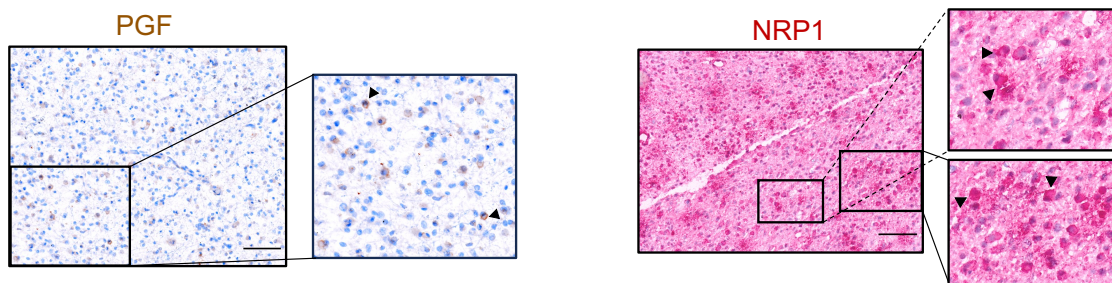

**Figure S9. IHC staining for IDH1 R132H, p-STAT1, CSF1, CSF1R, PGF and NRP1 in IDH mutant glioma tissues. Related to Figure 3. (A)** Representative double IHC staining for IDH1 R132H and p-STAT1 in grade 3 astrocytomas of four patients. Images were captured at 40x magnification, and crops from each image are shown next to their respective panels. Cells expressing both IDH1 R132H (brown) and p-STAT1 (blue) are indicated by black arrows. Cells expressing only p-STAT1 (blue) are marked by blue arrows, while cells expressing only IDH1 R132H (brown) are indicated by brown arrows. **(B)** Representative IHC staining for CSF1 (brown, left) and CSF1R (red, right) are shown in grade 2 primary astrocytomas. Nuclei are stained blue. Images are taken at 40x magnification, and crops from each image are shown next to their respective panels. Arrows indicate representative stained cells. Scale bar, 100  $\mu$ m. **(C)** Representative IHC staining for PGF (brown, left) and NRP1 (red, right) are shown in grade 2 astrocytomas. Images are taken at 40x magnification, and crops from each image are shown next to their corresponding panels. Nuclei are stained blue. Arrows indicate representative stained cells. Scale bar, 100  $\mu$ m.



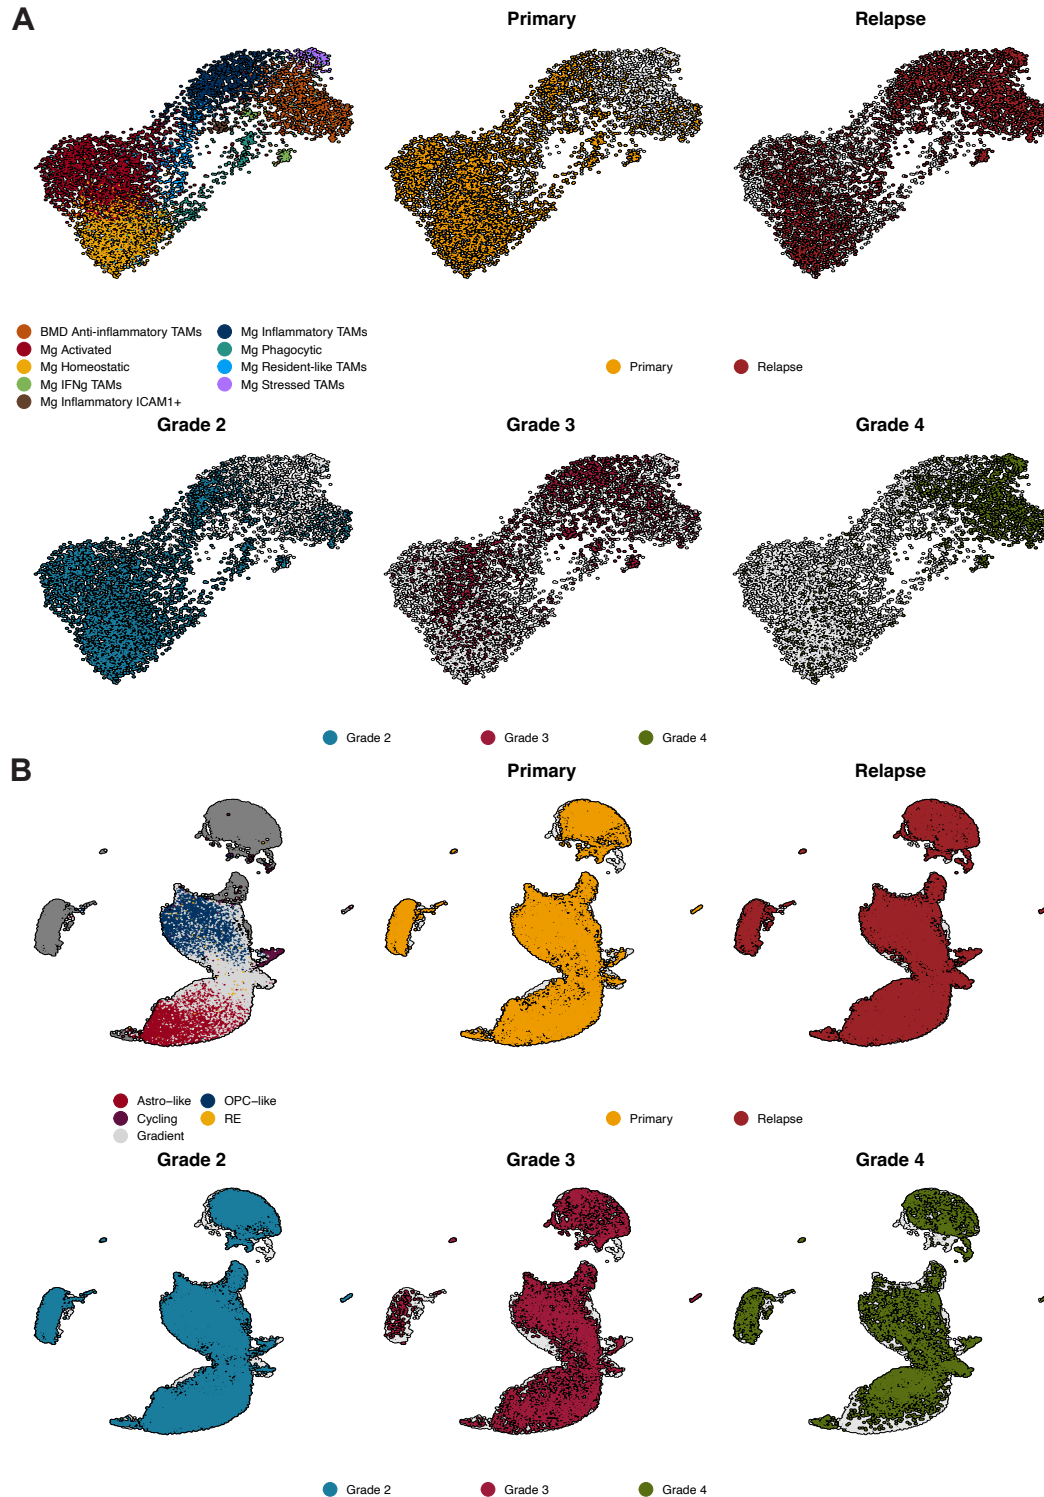

**Figure S10. UMAP of integrated TAMs and paired primary-recurrent astrocytomas. Related to Figures 3 and 4. (A)** UMAP representation of integrated microglia from astrocytomas and oligodendrogliomas. Colors depict TAM clusters (top left), relapse status (top middle, top right) or grade (bottom). UMAP1, *x*-axis; UMAP2, *y*-axis. **(B)** UMAP representation of paired astrocytomas. Clusters are colored by tumor populations (top left), relapse status (top middle, top right), or grade (bottom). UMAP1, *x*-axis; UMAP2, *y*-axis.
